# Supplementary material for: Aggregation of Thermoresponsive Polymethacrylates in a Dulbecco’s Modified Eagle Medium and Its Salts
Source: MDPI journal article supplement (doi:10.3390/polym15173587), 2023-08-29
Supplement: s1 [file s1]

## Supplementary information

# Aggregation of Thermoresponsive Polymethacrylates in a Dulbecco's Modified Eagle Medium and Its Salts

Łukasz Otulakowski \* and Barbara Trzebicka \*

Centre of Polymer and Carbon Materials, Polish Academy of Sciences, M. Curie-Skłodowskiej 34, 41-819 Zabrze, Poland

\* Correspondence: lotulakowski@cmpw-pan.pl (Ł.O.); btrzebicka@cmpw-pan.pl (B.T.)

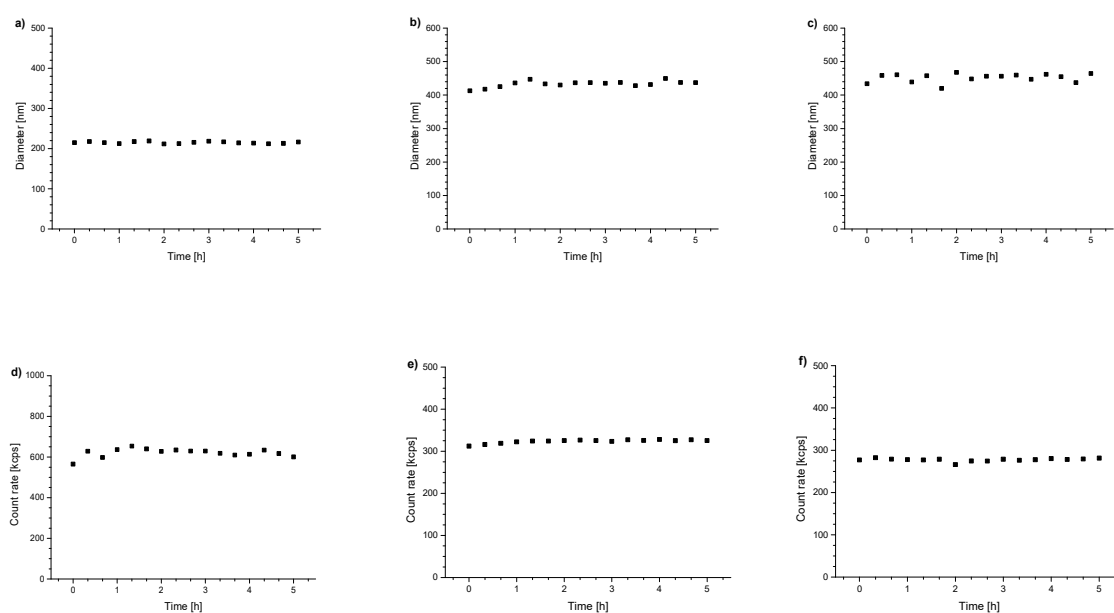

Figure S1. Hydrodynamic diameters of particles vs. time of incubation in water for a) PNIPAM, b) P(HEMA<sub>90</sub>-OEGMA<sub>10</sub>), c) POEGMA and scattered light intensity d) PNIPAM, e) P(HEMA<sub>90</sub>-OEGMA<sub>10</sub>), f) POEGMA

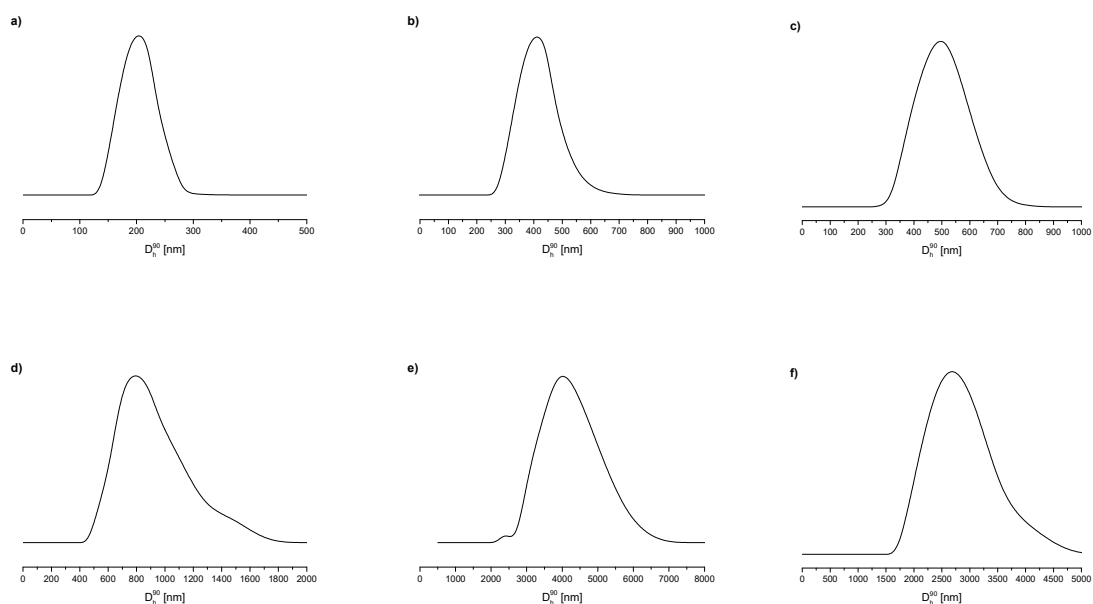

Figure S2. Size distributions of particles formed in water after 5h incubation for a) PNIPAM, b) P(HEMA<sub>90</sub>-OEGMA<sub>10</sub>), c) POEGMA, and size distributions of particles formed in DMEM for d) PNIPAM, e) P(HEMA<sub>90</sub>-OEGMA<sub>10</sub>), f) POEGMA, distributions for highest size detected.

Table S1. DMEM (5030) full composition provided by manufacturer

|                                                       | <b>D5030</b> |
|-------------------------------------------------------|--------------|
| <b>COMPONENT</b>                                      | <b>g/L</b>   |
| <b>Inorganic Salts</b>                                |              |
| CaCl <sub>2</sub>                                     | 0.2          |
| Fe(NO <sub>3</sub> ) <sub>3</sub> • 9H <sub>2</sub> O | 0.0001       |
| MgSO <sub>4</sub>                                     | 0.09767      |
| KCl                                                   | 0.4          |
| NaHCO <sub>3</sub>                                    | 3.7          |
| NaCl                                                  | 6.4          |
| NaH <sub>2</sub> PO <sub>4</sub>                      | 0.109        |
| <b>Amino Acids</b>                                    |              |
| L-Arginine • HCl                                      | 0.084        |
| L-Cystine • 2HCl                                      | 0.0626       |
| L-Glutamine                                           | 0.584        |
| Glycine                                               | 0.03         |
| L-Histidine • HCl • H <sub>2</sub> O                  | 0.042        |
| L-Isoleucine                                          | 0.105        |
| L-Leucine                                             | 0.105        |
| L-Lysine • HCl                                        | 0.146        |
| L-Methionine                                          | 0.03         |
| L-Phenylalanine                                       | 0.066        |
| L-Serine                                              | 0.042        |
| L-Threonine                                           | 0.095        |
| L-Tryptophan                                          | 0.016        |
| L-Tyrosine • 2Na • 2H <sub>2</sub> O                  | 0.10379      |
| L-Valine                                              | 0.094        |
| <b>Vitamins</b>                                       |              |
| Choline Chloride                                      | 0.004        |

|                          |        |
|--------------------------|--------|
| Folic Acid               | 0.004  |
| <i>myo</i> -Inositol     | 0.0072 |
| Niacinamide              | 0.004  |
| D-Pantothenic Acid • ½Ca | 0.004  |
| Pyridoxal • HCl          | 0.004  |
| Riboflavin               | 0.0004 |
| Thiamine • HCl           | 0.004  |
| <b>Other</b>             |        |
| D-Glucose                | 1.0    |

Table S2. Results from transmittance and DLS studies for PNIPAM

| Component                        | Component concentration [g/L] | Component concentration [mol/L] | T <sub>CP</sub> of polymer in solution [°C] | T <sub>CP</sub> Δ to water | Diameter in 55 °C [by int.] | Diameter Δ to water |
|----------------------------------|-------------------------------|---------------------------------|---------------------------------------------|----------------------------|-----------------------------|---------------------|
| Water                            |                               |                                 | 34.2                                        |                            | 215                         |                     |
| NaCl                             | 6.4                           | 0.109                           | 33.0                                        | -1.2                       | 405*                        |                     |
| NaHCO <sub>3</sub>               | 3.7                           | 0.044                           | 33.2                                        | -1                         | 336                         | 121                 |
| KCl                              | 0.4                           | 0.005                           | 33.9                                        | -0.3                       | 203                         | -12                 |
| CaCl <sub>2</sub>                | 0.2                           | 0.0018                          | 33.9                                        | -0.3                       | 228                         | 13                  |
| NaH <sub>2</sub> PO <sub>4</sub> | 0.109                         | 0.0009                          | 33.3                                        | -0.9                       | 197                         | -18                 |
| CuSO <sub>4</sub>                | 0.09767                       | 0.0006                          | 33.8                                        | -0.4                       | 205                         | -10                 |
| Glucose                          | 1                             | 0.0055                          | 34.4                                        | 0.2                        | 185                         | -30                 |
| L-Glutamine                      | 0.584                         | 0.004                           | 35.1                                        | 0.9                        | 171                         | -44                 |
| L-Lizyne * HCl                   | 0.146                         | 0.0008                          | 34.2                                        | 0                          | 184                         | -31                 |
| L-Izoleucine                     | 0.105                         | 0.0008                          | 34.6                                        | 0.4                        | 154                         | -61                 |
| L-leucine                        | 0.105                         | 0.0008                          | 34.8                                        | 0.6                        | 177                         | -38                 |
| L-Tyrosine *2Na                  | 0.10379                       | 0.0004                          | 34.8                                        | 0.6                        | 160                         | -55                 |
| DMEM                             |                               |                                 | 33.2                                        | -1                         | 771*                        |                     |

Table S3. Results from transmittance and DLS studies for HEMA<sub>90</sub>-OEGMA<sub>10</sub>

| Component          | Component concentration [g/L] | Component concentration [mol/L] | T <sub>CP</sub> of polymer in solution [°C] | T <sub>CP</sub> Δ to water | Diameter in 55 °C [by int.] | Diameter Δ to water |
|--------------------|-------------------------------|---------------------------------|---------------------------------------------|----------------------------|-----------------------------|---------------------|
| Water              |                               |                                 | 22.9                                        |                            | 431                         |                     |
| NaCl               | 6.4                           | 0.109                           | 20.1/31.0                                   | -2.8                       | 1833.6*                     |                     |
| NaHCO <sub>3</sub> | 3.7                           | 0.044                           | 19.9                                        | -3                         | 1881*                       |                     |
| KCl                | 0.4                           | 0.005                           | 22.3                                        | -0.6                       | 1979*                       |                     |

|                                  |         |        |      |      |       |     |
|----------------------------------|---------|--------|------|------|-------|-----|
| CaCl <sub>2</sub>                | 0.2     | 0.0018 | 22.7 | -0.2 | 1801* |     |
| NaH <sub>2</sub> PO <sub>4</sub> | 0.109   | 0.0009 | 23.0 | 0.1  | 416   | -15 |
| CuSO <sub>4</sub>                | 0.09767 | 0.0006 | 22.4 | -0.5 | 597   | 144 |
| Glucose                          | 1       | 0.0055 | 23.1 | 0.2  | 432   | 1   |
| L-Glutamine                      | 0.584   | 0.004  | 23.0 | 0.1  | 554   | 123 |
| L-Lizyne * HCl                   | 0.146   | 0.0008 | 23.0 | 0.1  | 435   | 4   |
| L-Izoleucine                     | 0.105   | 0.0008 | 23.7 | 0.8  | 440   | 9   |
| L-leucine                        | 0.105   | 0.0008 | 22.9 | 0    | 434   | 3   |
| L-Tyrosine<br>*2Na               | 0.10379 | 0.0004 | 23.8 | 0.9  | 341   | -90 |
| DMEM                             |         |        | 20.0 | -2.9 | 3942* |     |

Table S4. Results from transmittance and DLS studies for POEGMA

| Component                        | Component concentration [g/L] | Component concentration [mol/L] | T <sub>CP</sub> of polymer in solution [°C] | T <sub>CP</sub> Δ to water | Diameter after 4 h in 55 °C [by int.] | Diameter Δ to water |
|----------------------------------|-------------------------------|---------------------------------|---------------------------------------------|----------------------------|---------------------------------------|---------------------|
| Water                            |                               |                                 | 70.2                                        |                            | 462                                   |                     |
| NaCl                             | 6.4                           | 0.109                           | 66.6                                        | -3.6                       | 1872*                                 |                     |
| NaHCO <sub>3</sub>               | 3.7                           | 0.044                           | 68.8                                        | -1.4                       | 2199*                                 |                     |
| KCl                              | 0.4                           | 0.005                           | 69.5                                        | -0.7                       | 1126                                  | 664                 |
| CaCl <sub>2</sub>                | 0.2                           | 0.0018                          | 69.6                                        | -0.6                       | 1277                                  | 815                 |
| NaH <sub>2</sub> PO <sub>4</sub> | 0.109                         | 0.0009                          | 69.5                                        | -0.7                       | 657                                   | 195                 |
| CuSO <sub>4</sub>                | 0.09767                       | 0.0006                          | 69.4                                        | -0.8                       | 929                                   | 467                 |
| Glucose                          | 1                             | 0.0055                          | 69.7                                        | -0.5                       | 471                                   | 9                   |
| L-Glutamine                      | 0.584                         | 0.004                           | 69.5                                        | -0.7                       | 586                                   | 124                 |
| L-Lizyne * HCl                   | 0.146                         | 0.0008                          | 70.1                                        | -0.1                       | 426                                   | -36                 |
| L-Izoleucine                     | 0.105                         | 0.0008                          | 70.0                                        | -0.2                       | 454                                   | -6                  |
| L-leucine                        | 0.105                         | 0.0008                          | 70.2                                        | 0                          | 420                                   | -42                 |
| L-Tyrosine<br>*2Na               | 0.10379                       | 0.0004                          | 70.7                                        | 0.5                        | 543                                   | 81                  |
| DMEM                             |                               |                                 | 64.1                                        | -6.1                       | 2654*                                 |                     |

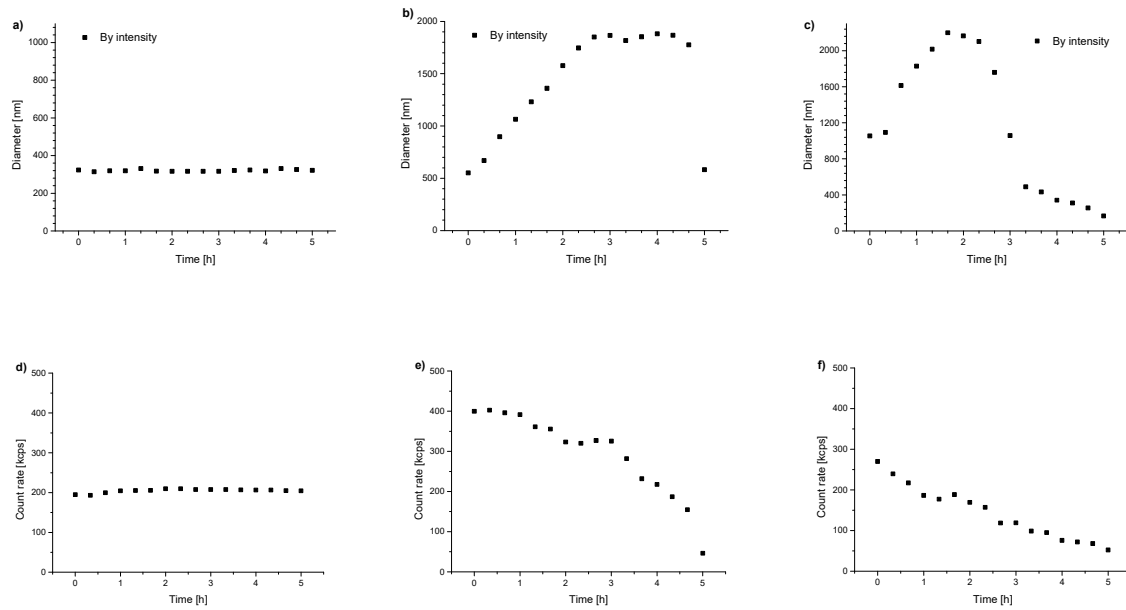

Figure S3. Hydrodynamic diameters of particles vs. time of incubation in solution of  $\text{NaHCO}_3$  for a) PNIPAM, b) P(HEMA<sub>90</sub>-OEGMA<sub>10</sub>), c) POEGMA and scattered light intensity d) PNIPAM, e) P(HEMA<sub>90</sub>-OEGMA<sub>10</sub>), f) POEGMA

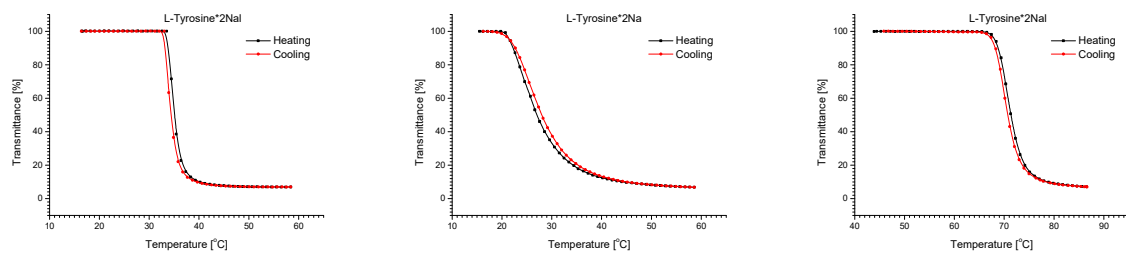

Figure S4. Transmittance vs temperature plots for a) PNIPAM, b) P(HEMA<sub>90</sub>-OEGMA<sub>10</sub>), c) POEGMA in solution of L-tyrosine\*2Na

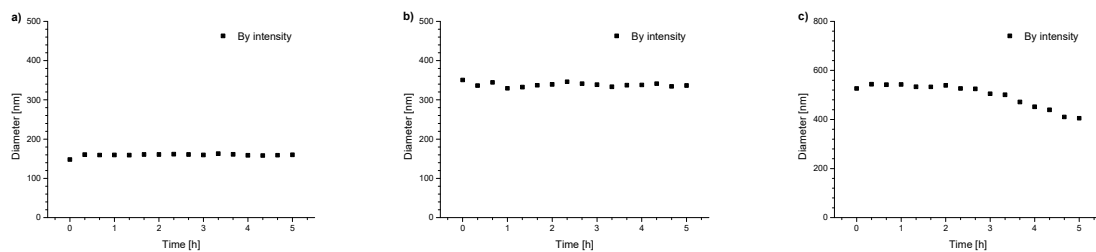

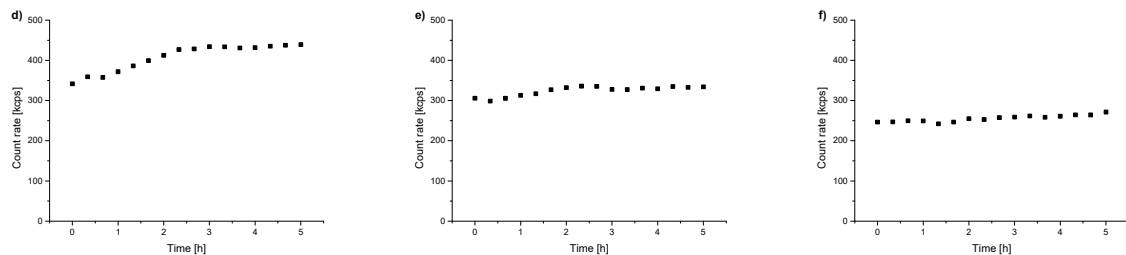

Figure S5. Hydrodynamic diameters of particles vs. time of incubation in solution of L-tyrosine\*2Na for a) PNIPAM, b) P(HEMA<sub>90</sub>-OEGMA<sub>10</sub>), c) POEGMA and scattered light intensity d) PNIPAM, e) P(HEMA<sub>90</sub>-OEGMA<sub>10</sub>), f) POEGMA

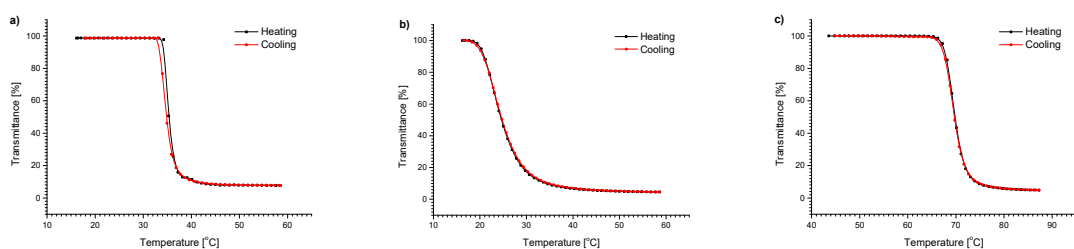

Figure S6. Transmittance vs temperature plots for a) PNIPAM, b) P(HEMA<sub>90</sub>-OEGMA<sub>10</sub>), c) POEGMA in solution of L-glutamine.

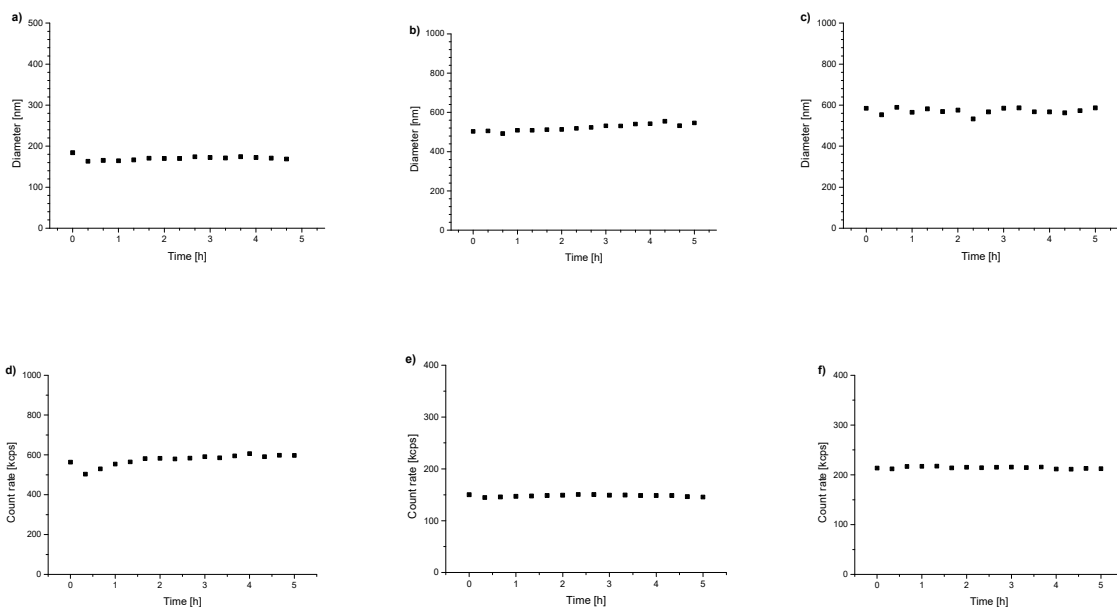

Figure S7. Hydrodynamic diameters of particles vs. time of incubation in solution of L-glutamine for a)PNIPAM, b) P(HEMA<sub>90</sub>-OEGMA<sub>10</sub>), c) POEGMA and scattered light intensity d)PNIPAM, e) P(HEMA<sub>90</sub>-OEGMA<sub>10</sub>), f) POEGMA

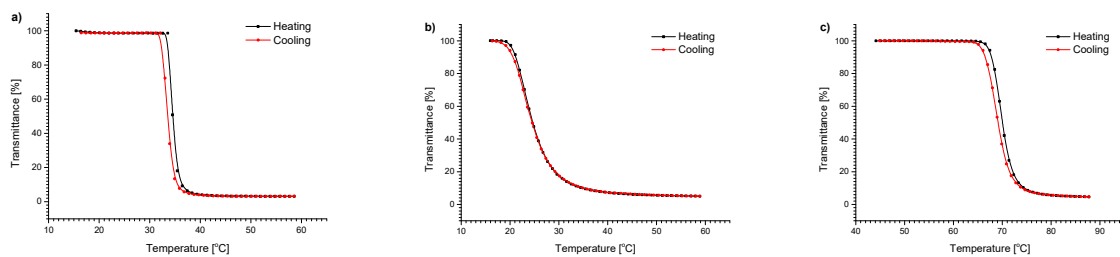

Figure S8. Transmittance vs temperature plots for a) PNIPAM, b) P(HEMA<sub>90</sub>-OEGMA<sub>10</sub>), c) POEGMA in solution of glucose

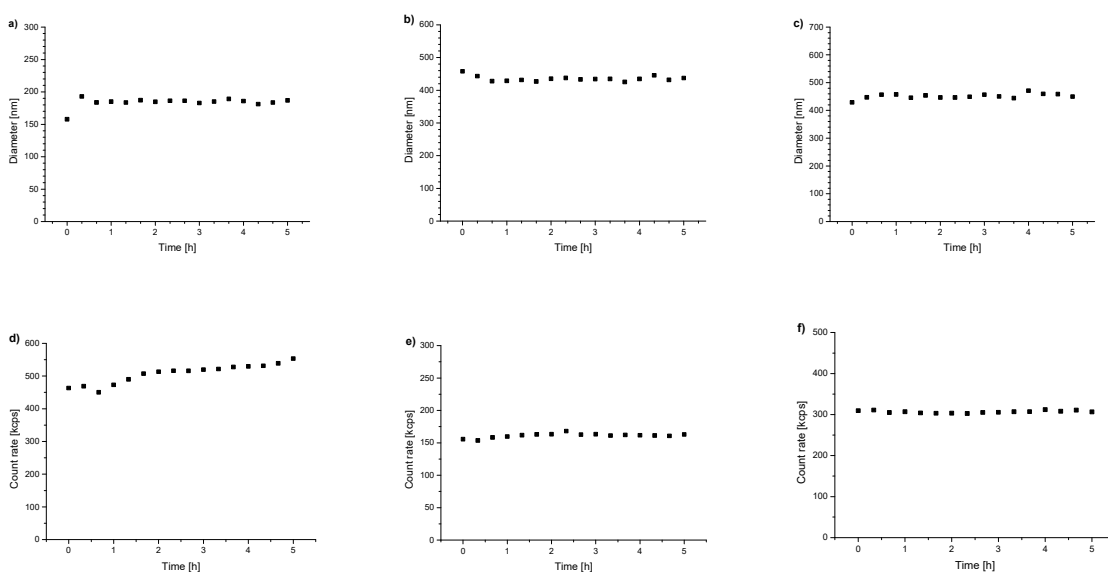

Figure S9. Hydrodynamic diameters of particles vs. time of incubation in solution of glucose for a) PNIPAM, b) P(HEMA<sub>90</sub>-OEGMA<sub>10</sub>), c) POEGMA and scattered light intensity d) PNIPAM, e) P(HEMA<sub>90</sub>-OEGMA<sub>10</sub>), f) POEGMA

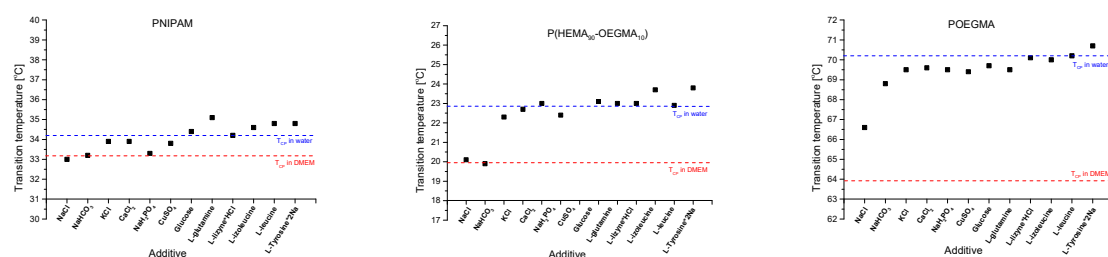

Figure S10. T<sub>CP</sub> recorded for different additives in comparison with T<sub>CP</sub> in water and in DMEM for a) PNIPAM, b) P(HEMA<sub>90</sub>-OEGMA<sub>10</sub>), c) POEGMA
